# Supplementary material for: The Association Between Alveolar–Arterial Oxygen Tension Difference and the Severity of COVID-19 in Patients
Source: Springer Nature journal article supplement (doi:10.1007/s40121-022-00752-3), 2023-01-05
Supplement: MOESM1 [file 23892906]

## **The association between alveolar-arterial oxygen tension difference and the severity of COVID-19 in patients**

Canbin Xie<sup>1</sup>, Jiayi Deng<sup>1</sup>, Fanglin Li<sup>1</sup>, Chenfang Wu<sup>1</sup>, Min Xu<sup>1</sup>, Bo Yu<sup>1</sup>, Guobao Wu<sup>1</sup>, Yanjun Zhong<sup>1</sup>, Da Tang<sup>1\*</sup>, Jinxiu Li<sup>1\*</sup>

### **Author affiliations:**

<sup>1</sup>Critical Care Medicine, The Second Xiangya Hospital, Central South University, Changsha, China.

First author: Canbin Xie

Correspondence: \*Da Tang, [darmuyu@qq.com](mailto:darmuyu@qq.com) (Lead contact) or \*Jinxiu Li, [jinxiuli2021@csu.edu.cn](mailto:jinxiuli2021@csu.edu.cn)

**Supplementary table 1 Major baseline characteristics and outcomes of COVID-19 patients with normal P<sub>A-a</sub>O<sub>2</sub> and abnormal P<sub>A-a</sub>O<sub>2</sub> after matching with age**

|                                     | Normal P <sub>A-a</sub> O <sub>2</sub><br>(n=82) | Abnormal P <sub>A-a</sub> O <sub>2</sub><br>(n=82) | <i>P</i> value |
|-------------------------------------|--------------------------------------------------|----------------------------------------------------|----------------|
| Gender (male/female)                | 43/39                                            | 40/42                                              | 0.755          |
| Age, y, M (IQR)                     | 41 (31, 59.25)                                   | 41 (32, 59.50)                                     | 0.862          |
| Smoking (n,)                        | 8                                                | 7                                                  | 0.786          |
| Drinking (n,)                       | 5                                                | 2                                                  | 0.440          |
| <b>Symptoms</b>                     |                                                  |                                                    |                |
| Fever (n)                           | 56                                               | 66                                                 | 0.074          |
| Fatigue (n)                         | 28                                               | 45                                                 | 0.008          |
| Cough (n)                           | 61                                               | 71                                                 | 0.106          |
| Shortness of breath                 | 21                                               | 34                                                 | 0.032          |
| Expectoration (n)                   | 38                                               | 37                                                 | 0.875          |
| Hemoptysis (n)                      | 2                                                | 2                                                  | 1.000          |
| Pharyngalgia (n)                    | 13                                               | 14                                                 | 0.833          |
| Vomiting (n)                        | 11                                               | 7                                                  | 0.318          |
| Diarrhea (n)                        | 20                                               | 22                                                 | 0.720          |
| Abdominal pain (n)                  | 6                                                | 2                                                  | 0.277          |
| Nausea (n)                          | 9                                                | 12                                                 | 0.483          |
| Anorexia (n)                        | 39                                               | 37                                                 | 0.754          |
| Myalgia (n)                         | 8                                                | 12                                                 | 0.340          |
| Chill (n)                           | 11                                               | 10                                                 | 0.815          |
| Dizziness (n)                       | 12                                               | 12                                                 | 1.000          |
| Headache (n)                        | 11                                               | 14                                                 | 0.515          |
| Hypertension (n)                    | 10                                               | 11                                                 | 0.815          |
| Cardiovascular (n)                  | 6                                                | 2                                                  | 0.277          |
| Diabetes (n)                        | 7                                                | 2                                                  | 0.170          |
| <b>Outcomes</b>                     |                                                  |                                                    |                |
| Severe event (n)                    | 9                                                | 21                                                 | 0.015          |
| Virus shedding time (days, IQR)     | 17 (13, 23.5)                                    | 20.5 (13.75, 29.25)                                | 0.042          |
| Length of hospital stay (days, IQR) | 15 (11, 23)                                      | 19 (13, 28.25)                                     | 0.016          |

IQR: interquartile range.

**Supplementary Table 2 Association of  $P_{A-a}O_2$  and disease severity in the Logistic regression model in COVID-19 patients matched with age**

| Variables              | Multivariate logistic regression analysis |       |        |          |         |        |        |
|------------------------|-------------------------------------------|-------|--------|----------|---------|--------|--------|
|                        | B                                         | SE    | Wald   | <i>P</i> | Exp (B) | 95% CI |        |
|                        |                                           |       |        |          |         | Lower  | Upper  |
| PA-aO <sub>2</sub>     | 1.263                                     | 0.21  | 5.880  | 0.015*   | 3.535   | 1.274  | 9.807  |
| Gender                 | NA                                        | NA    | NA     | NA       | NA      | NA     | NA     |
| Hypertension           | 2.185                                     | 0.634 | 11.864 | 0.001*   | 8.891   | 2.564  | 30.830 |
| Cardiovascular disease | NA                                        | NA    | NA     | NA       | NA      | NA     | NA     |
| Diabetes               | NA                                        | NA    | NA     | NA       | NA      | NA     | NA     |
| Smoking                | NA                                        | NA    | NA     | NA       | NA      | NA     | NA     |
| Alcohol                | NA                                        | NA    | NA     | NA       | NA      | NA     | NA     |

\* means a significant difference; NA, not available.
